# Supplementary material
Source: publisher site journal article supplement (https://www.dovepress.com/get_supplementary_file.php?f=461935.docx)
Supplement: Supplementary file 1 [file get_supplementary_file.php]

**Microbiological Profile of Patients with Aspiration Pneumonia Identified by Combined Detection Methods**

**Supplementary file**

Hui Xu1, Ruixue Zhang1, Xiaoxue Zhang1, Yueguang Cheng2, Liping Lv3, Lianjun Lin1

1Department of Geriatrics, Peking University First Hospital, Beijing, China; 2Department of Emergency, Beijing Jingmei Group General Hospital, Beijing, China; 3Department of Intervention Pulmonology, Anhui Chest Hospital, Hefei, China.

Correspondence: Lianjun Lin. Department of Geriatrics, Peking University First Hospital, Xishiku Avenue 8, Xicheng District, Beijing, 100034, P.R. China. Email: 06474@pkufh.com

**Table S1.** Biochemical parameters of the study participants.

| Variables | All (N=39) | AspRF-CAP (N=11) | AP (N=28) | *P* value |
| --- | --- | --- | --- | --- |
| BALF amylase, IU/L | 1041.72 (3836.56) | 184.27 (345.64) | 1862.10 (10200.84) | 0.004 |
| Blood routine |  |  |  |  |
| White blood cell counts, ×109/L | 11.00 (9.57) | 8.68 (6.45) | 12.25 (13.93) | 0.151 |
| Neutrophil counts, ×109/L | 9.10 (9.39) | 6.73 (7.85) | 9.33 (9.59) | 0.170 |
| Lymphocyte counts, ×109/L | 1.17 (1.09) | 1.10 (0.92) | 1.19 (1.25) | 0.357 |
| Monocyte counts, ×109/L | 0.44 (0.45) | 0.46 (0.24) | 0.44 (0.52) | 0.988 |
| Eosinophil counts, ×109/L 3 | 0.05 (0.09) | 0.08 (0.09) | 0.05 (0.13) | 0.571 |
| Basophilic granulocyte counts, ×109/L | 0.02 (0.04) | 0.02 (0.02) | 0.03 (0.07) | 0.528 |
| Platelet counts, ×109/L | 225.0 (164.0) | 192.0 (102.0) | 232.5 (192.0) | 0.901 |
| Hemoglobin | 111.0 (45.0) | 111.0 (40.0) | 105.5 (45.0) | 0.901 |
| Blood biochemistry |  |  |  |  |
| Alanine transaminase | 16.0 (19.6) | 16.0 (15.4) | 16.2 (20.4) | 0.767 |
| Aspartate aminotransferase | 22.9 (20.9) | 20.0 (12.0) | 24.4 (23.8) | 0.913 |
| Serum albumin | 29.1 (11.8) | 34.5 (10.6) | 27.1 (10.3) | 0.126 |
| Total bilirubin | 11.5 (13.2) | 11.4 (5.2) | 12.6 (16.2) | 0.685 |
| Direct bilirubin | 3.0 (5.7) | 2.2 (3.7) | 3.3 (7.0) | 0.165 |
| Blood urea nitrogen | 8.40 (8.90) | 5.20 (9.70) | 9.90 (9.60) | 0.068 |
| Serum creatinine | 78.00 (54.70) | 68.6 (31.2) | 86.85 (83.4) | 0.174 |
| Uric acid | 335.10 (254.9) | 242.3 (237.5) | 367.85 (291.9) | 0.134 |
| Blood sodium, mmol/L | 139.5 (4.6) | 140.8 (0.9) | 138.55 (9.4) | 0.108 |
| Blood potassium, mmol/L | 3.81 (0.78) | 3.71 (0.56) | 3.88 (0.95) | 0.720 |
| Blood chlorine, mmol/L | 103.9 (10.0) | 103.9 (8.0) | 103.8 (13.4) | 0.876 |
| Blood phosphorus, mmol/L | 1.08 (0.48) | 1.08 (0.17) | 1.08 (0.62) | 0.975 |
| Blood calcium, mmol/L | 2.11 (0.32) | 1.99 (0.42) | 2.14 (0.23) | 0.160 |
| Blood magnesium, mmol/L | 0.81 (0.26) | 0.77 (0.25) | 0.85 (0.31) | 0.063 |
| Blood glucose, mmol/L | 7.81 (10.0) | 5.42 (2.52) | 10.13 (11.09) | 0.010 |
| Fibrinogen, mmol/L | 3.80 (1.56) | 4.20 (2.15) | 3.69 (1.14) | 0.261 |
| Prothrombin time, s | 12.80 (2.0) | 12.0 (3.0) | 12.85 (1.70) | 0.248 |
| Activated partial thromboplastin time, s | 30.40 (5.50) | 31.60 (1.40) | 29.90 (5.7) | 0.248 |

Note: Values are median (IQR).

Abbreviations: AspRF-CAP, community-acquired pneumonia with aspiration risk factors; AP, aspiration pneumonia; BALF, bronchoalveolar lavage fluid.


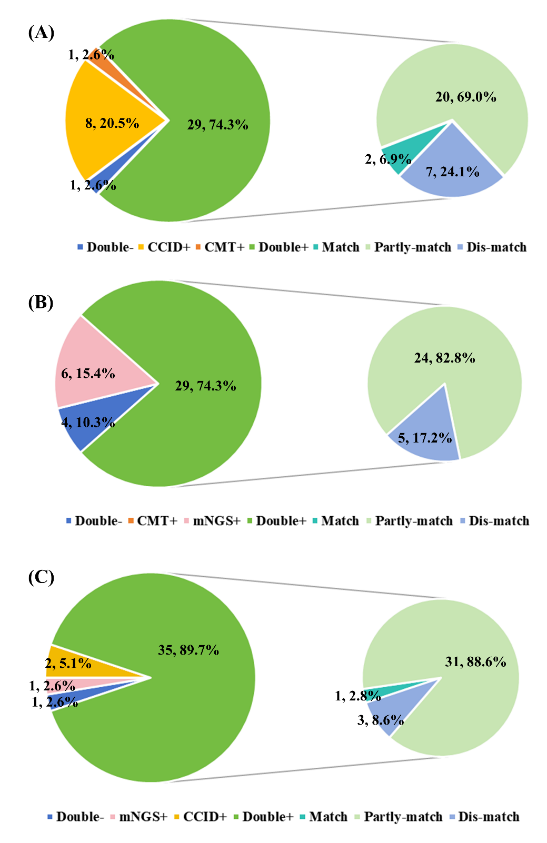


**Figure S1.** The positive distribution and concordance of different diagnostic tools. (A) Pie chart demonstrating the positivity distribution and concordance between CMTs and CCID. (B) Pie chart demonstrating the positivity distribution and concordance between CMTs and mNGS. (C) Pie chart demonstrating the positivity distribution and concordance between CCID and mNGS**.**

**
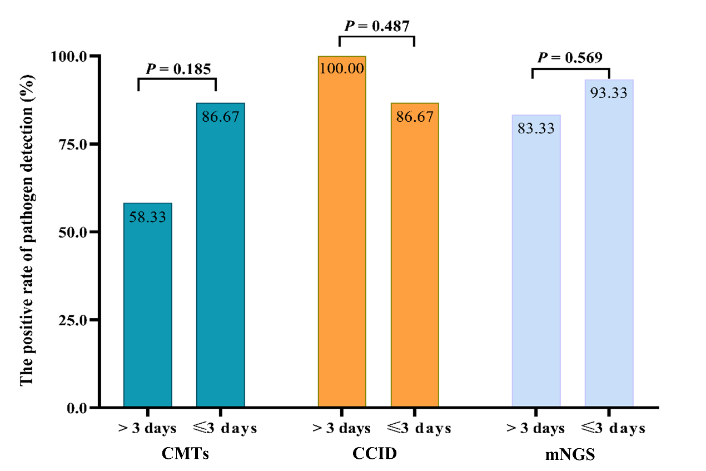
**

**Figure S2.** The positive rates of different detection methods in patients treated with antibiotics for ≤3 days and > 3 days. In 12 patients who had used antibiotics for > 3 days at the time of specimen collection, the positive rates of CMTs, CCID, and mNGS were 58.33% (7/12), 100% (12/12), and 83.33% (10/12), respectively, whereas of which patients treated with antibiotics for ≤ 3 days, the positive rates of CMTs, CCID, and mNGS were 86.67% (13/15), 86.67% (13/15), and 93.33% (14/15), respectively. No significant difference was observed.
